# Supplementary material
Source: Springer Nature journal article supplement (https://www.springermedizin.de/resource/supplementary/13000_2011_458_MOESM1_ESM.pdf/9624608)
Supplement: MOESM1 [file 9624608]

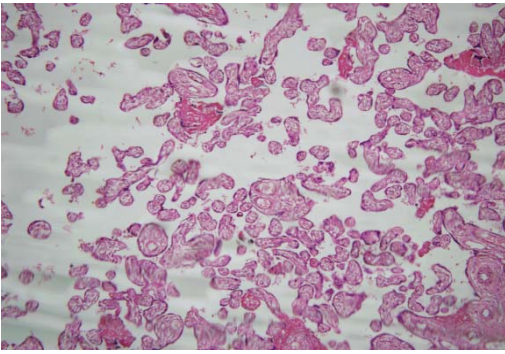

Placenta negative for malaria (H &E × 10)

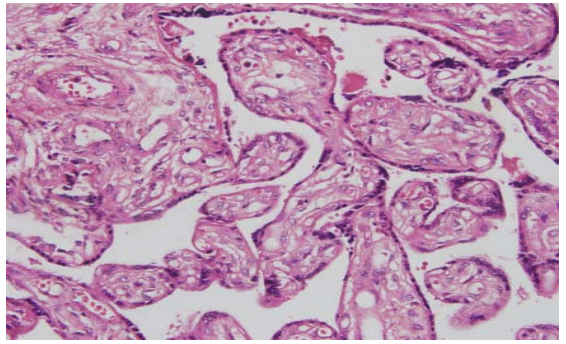

Placenta negative for malaria (H &E × 40)

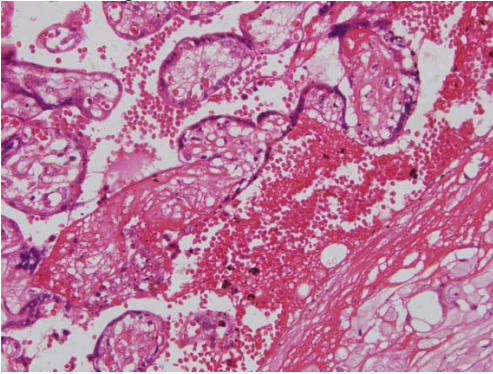

Chronic malaria infection (H&E ×10)

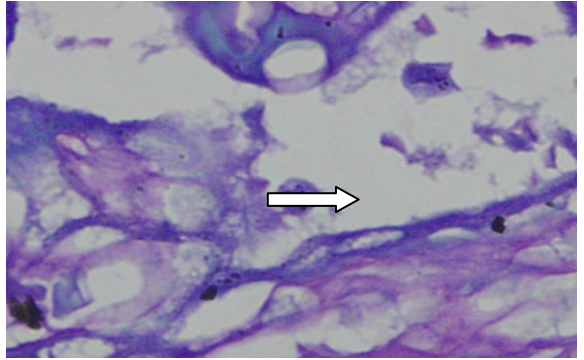

Schizont in chronic malaria infection (Giemsa stain ×100)

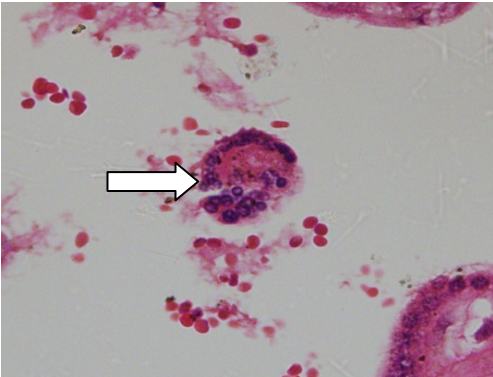

Giant cell in chronic malaria infection

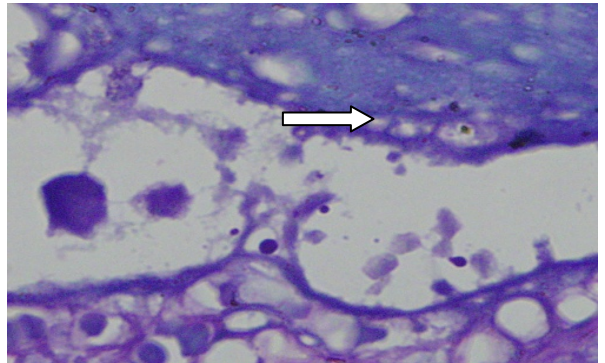

Trophozoite in chronic malaria infection

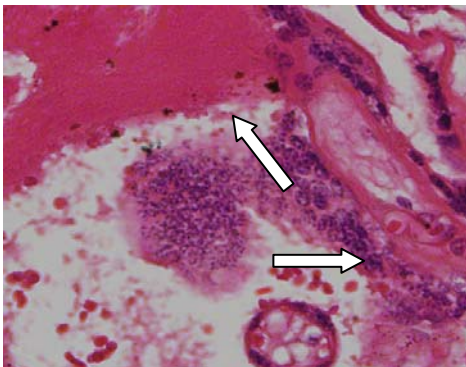

Fibrin pigment and giant cell in chronic malaria infection (Giemsa × 40)

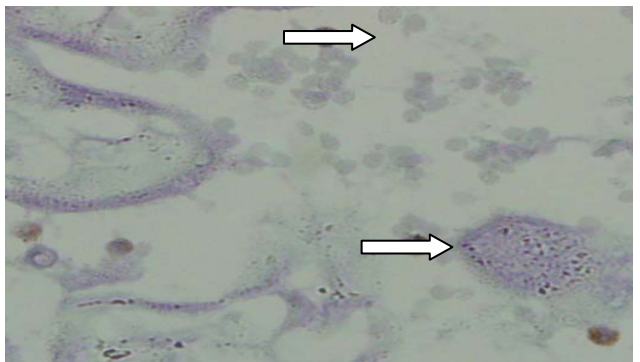

CD68 Macrophage in placenta with past malaria infection (Immunocytochemistry × 40)
